# Supplementary material for: The Role of Water Relations and Oxidative Stress in the Vase Life Response to Prolonged Storage: A Case Study in Chrysanthemum
Source: MDPI journal article supplement (doi:10.3390/agriculture12020185), 2022-01-27
Supplement: s1 [file s1]

**Supplementary Table S1.** Effect of storage period (5 °C and darkness) on the photochemical reflectance index (PRI), renormalized difference vegetation index (RDVI), water index (WI), normalized difference vegetation index (NDVI), ratio of WI with NDVI (WI:NDVI), normalized water index (NWI), optimized soil-adjusted vegetation index (OSAVI), structure independent pigment index (SIPI), blue/green index 2 (BGI2), triangular vegetation index (TVI), and modified chlorophyll absorption in reflectance index (MCARI) of the adaxial leaf surface in three cut chrysanthemum cultivars. The indices equation is provided in Table 1. Different letters within each line indicate significant differences based on Tukey's Honest significant difference test at  $P \leq 0.05$  (n = 6).

| Cultivar      | Index          | Storage (d) |        |        |        | P value  |
|---------------|----------------|-------------|--------|--------|--------|----------|
|               |                | 0           | 7      | 14     | 21     |          |
| 'Pina Colada' | <b>PRI570</b>  | -0.013      | -0.012 | -0.008 | -0.011 | 1.00E+00 |
|               | <b>RDVI</b>    | 7.238       | 7.364  | 7.008  | 6.830  | 1.00E+00 |
|               | <b>WI</b>      | 0.970       | 0.931  | 0.934  | 0.940  | 1.00E+00 |
|               | <b>NDVI</b>    | 0.515       | 0.520  | 0.495  | 0.471  | 1.00E+00 |
|               | <b>WI:NDVI</b> | 1.884       | 1.791  | 1.887  | 1.996  | 1.00E+00 |
|               | <b>NWI</b>     | 0.015       | 0.036  | 0.034  | 0.031  | 1.00E+00 |
|               | <b>OSAVI</b>   | 0.597       | 0.603  | 0.574  | 0.546  | 1.00E+00 |
|               | <b>SIPI</b>    | 0.504       | 0.514  | 0.494  | 0.465  | 1.00E+00 |
|               | <b>BGI2</b>    | 0.782       | 0.771  | 0.814  | 0.815  | 1.00E+00 |
|               | <b>TVI</b>     | 7044        | 7192   | 6623   | 6844   | 1.00E+00 |
|               | <b>MCARI</b>   | 36.09       | 41.53  | 29.95  | 32.27  | 1.00E+00 |
| 'Code Green'  | <b>PRI570</b>  | -0.007      | -0.011 | -0.008 | 0.004  | 1.00E+00 |
|               | <b>RDVI</b>    | 6.560       | 7.177  | 7.571  | 6.667  | 1.00E+00 |
|               | <b>WI</b>      | 0.967       | 0.916  | 0.931  | 0.933  | 1.00E+00 |
|               | <b>NDVI</b>    | 0.481       | 0.512  | 0.539  | 0.477  | 1.00E+00 |
|               | <b>WI:NDVI</b> | 2.012       | 1.789  | 1.727  | 1.956  | 1.00E+00 |
|               | <b>NWI</b>     | 0.017       | 0.044  | 0.036  | 0.034  | 1.00E+00 |
|               | <b>OSAVI</b>   | 0.557       | 0.593  | 0.625  | 0.553  | 1.00E+00 |

|                     |                |        |       |        |        |          |
|---------------------|----------------|--------|-------|--------|--------|----------|
|                     | <b>SIPI</b>    | 0.471  | 0.505 | 0.536  | 0.392  | 1.00E+00 |
|                     | <b>BGI2</b>    | 0.831  | 0.788 | 0.754  | 1.056  | 1.00E+00 |
|                     | <b>TVI</b>     | 6085   | 6845  | 6442   | 6405   | 1.00E+00 |
|                     | <b>MCARI</b>   | 25.84  | 35.47 | 45.34  | 35.63  | 1.00E+00 |
| <b>'Euro White'</b> | <b>PRI570</b>  | -0.009 | 0.000 | -0.005 | -0.006 | 1.00E+00 |
|                     | <b>RDVI</b>    | 7.921  | 7.583 | 7.752  | 6.958  | 1.00E+00 |
|                     | <b>WI</b>      | 0.971  | 0.949 | 0.960  | 0.936  | 1.00E+00 |
|                     | <b>NDVI</b>    | 0.552  | 0.526 | 0.539  | 0.499  | 1.00E+00 |
|                     | <b>WI:NDVI</b> | 1.760  | 1.803 | 1.781  | 1.876  | 1.00E+00 |
|                     | <b>NWI</b>     | 0.015  | 0.026 | 0.020  | 0.033  | 1.00E+00 |
|                     | <b>OSAVI</b>   | 0.640  | 0.610 | 0.625  | 0.578  | 1.00E+00 |
|                     | <b>SIPI</b>    | 0.545  | 0.519 | 0.532  | 0.494  | 1.00E+00 |
|                     | <b>BGI2</b>    | 0.781  | 0.812 | 0.797  | 0.788  | 1.00E+00 |
|                     | <b>TVI</b>     | 7727   | 7405  | 7566   | 6705   | 1.00E+00 |
|                     | <b>MCARI</b>   | 33.10  | 33.25 | 33.17  | 32.95  | 1.00E+00 |

**Supplementary Table S2.** Effect of storage period (5 °C and darkness) on the photochemical reflectance index (PRI), renormalized difference vegetation index (RDVI), water index (WI), normalized difference vegetation index (NDVI), ratio of WI with NDVI (WI:NDVI), normalized water index (NWI), optimized soil-adjusted vegetation index (OSAVI), structure independent pigment index (SIPI), blue/green index 2 (BGI2), triangular vegetation index (TVI), and modified chlorophyll absorption in reflectance index (MCARI) of the abaxial leaf surface in three cut chrysanthemum cultivars. The indices equation is provided in Table 1. Different letters within each line indicate significant differences based on Tukey's Honest significant difference test at  $P \leq 0.05$  (n = 6).

| Cultivar      | Index          | Storage (d) |        |        |        | P value  |
|---------------|----------------|-------------|--------|--------|--------|----------|
|               |                | 0           | 7      | 14     | 21     |          |
| 'Pina Colada' | <b>PRI570</b>  | -0.005      | -0.007 | -0.003 | -0.012 | 1.00E+00 |
|               | <b>RDVI</b>    | 6.193       | 6.447  | 5.994  | 6.204  | 1.00E+00 |
|               | <b>WI</b>      | 0.940       | 0.916  | 0.920  | 0.927  | 1.00E+00 |
|               | <b>NDVI</b>    | 0.452       | 0.447  | 0.426  | 0.433  | 1.00E+00 |
|               | <b>WI:NDVI</b> | 2.082       | 2.049  | 2.161  | 2.140  | 1.00E+00 |
|               | <b>NWI</b>     | 0.031       | 0.044  | 0.041  | 0.038  | 1.00E+00 |
|               | <b>OSAVI</b>   | 0.523       | 0.518  | 0.494  | 0.502  | 1.00E+00 |
|               | <b>SIPI</b>    | 0.452       | 0.450  | 0.433  | 0.440  | 1.00E+00 |
|               | <b>BGI2</b>    | 0.725       | 0.724  | 0.757  | 0.726  | 1.00E+00 |
|               | <b>TVI</b>     | 6232        | 5979   | 5966   | 5736   | 1.00E+00 |
|               | <b>MCARI</b>   | 44.61       | 53.59  | 38.80  | 47.89  | 1.00E+00 |
| 'Code Green'  | <b>PRI570</b>  | -0.011      | -0.010 | -0.006 | -0.005 | 1.00E+00 |
|               | <b>RDVI</b>    | 5.667       | 5.277  | 6.259  | 5.689  | 1.00E+00 |
|               | <b>WI</b>      | 0.935       | 0.899  | 0.919  | 0.918  | 1.00E+00 |
|               | <b>NDVI</b>    | 0.406       | 0.402  | 0.437  | 0.398  | 1.00E+00 |
|               | <b>WI:NDVI</b> | 2.304       | 2.237  | 2.103  | 2.309  | 1.00E+00 |
|               | <b>NWI</b>     | 0.034       | 0.053  | 0.042  | 0.043  | 1.00E+00 |
|               | <b>OSAVI</b>   | 0.470       | 0.466  | 0.507  | 0.461  | 1.00E+00 |

|                     |                |        |        |        |        |          |
|---------------------|----------------|--------|--------|--------|--------|----------|
|                     | <b>SIPI</b>    | 0.405  | 0.406  | 0.446  | 0.412  | 1.00E+00 |
|                     | <b>BGI2</b>    | 0.749  | 0.745  | 0.710  | 0.707  | 1.00E+00 |
|                     | <b>TVI</b>     | 5769   | 4981   | 5735   | 5353   | 1.00E+00 |
|                     | <b>MCARI</b>   | 37.09  | 34.60  | 53.04  | 49.76  | 1.00E+00 |
| <b>‘Euro White’</b> | <b>PRI570</b>  | -0.019 | -0.005 | -0.012 | -0.009 | 1.00E+00 |
|                     | <b>RDVI</b>    | 6.214  | 6.059  | 6.137  | 5.647  | 1.00E+00 |
|                     | <b>WI</b>      | 0.945  | 0.928  | 0.937  | 0.940  | 1.00E+00 |
|                     | <b>NDVI</b>    | 0.427  | 0.426  | 0.427  | 0.381  | 1.00E+00 |
|                     | <b>WI:NDVI</b> | 2.212  | 2.179  | 2.196  | 2.466  | 1.00E+00 |
|                     | <b>NWI</b>     | 0.028  | 0.037  | 0.033  | 0.031  | 1.00E+00 |
|                     | <b>OSAVI</b>   | 0.495  | 0.494  | 0.495  | 0.442  | 1.00E+00 |
|                     | <b>SIPI</b>    | 0.427  | 0.425  | 0.426  | 0.394  | 1.00E+00 |
|                     | <b>BGI2</b>    | 0.698  | 0.726  | 0.712  | 0.729  | 1.00E+00 |
|                     | <b>TVI</b>     | 6816   | 5626   | 6221   | 5474   | 1.00E+00 |
|                     | <b>MCARI</b>   | 50.12  | 49.82  | 50.00  | 46.86  | 1.00E+00 |

**Supplementary Table S3.** Effect of storage period (5 °C and darkness) on the photochemical reflectance index (PRI), renormalized difference vegetation index (RDVI), water index (WI), normalized difference vegetation index (NDVI), ratio of WI with NDVI (WI:NDVI), normalized water index (NWI), optimized soil-adjusted vegetation index (OSAVI), structure independent pigment index (SIPI), blue/green index 2 (BGI2), triangular vegetation index (TVI), and modified chlorophyll absorption in reflectance index (MCARI) of the flower (top view) in three cut chrysanthemum cultivars. The indices equation is provided in Table 1. Different letters within each line indicate significant differences based on Tukey's Honest significant difference test at  $P \leq 0.05$  (n = 6).

| Cultivar      | Index          | Storage (d) |        |        |        | P value  |
|---------------|----------------|-------------|--------|--------|--------|----------|
|               |                | 0           | 7      | 14     | 21     |          |
| 'Pina Colada' | <b>PRI570</b>  | 0.036       | 0.030  | 0.040  | 0.026  | 1.00E+00 |
|               | <b>RDVI</b>    | 0.665       | 0.589  | 0.773  | 0.674  | 1.00E+00 |
|               | <b>WI</b>      | 1.017       | 0.998  | 0.998  | 0.998  | 1.00E+00 |
|               | <b>NDVI</b>    | 0.036       | 0.032  | 0.042  | 0.036  | 1.00E+00 |
|               | <b>WI:NDVI</b> | 28.44       | 30.73  | 23.58  | 27.87  | 1.00E+00 |
|               | <b>NWI</b>     | -0.008      | 0.001  | 0.001  | 0.001  | 1.00E+00 |
|               | <b>OSAVI</b>   | 0.041       | 0.038  | 0.049  | 0.042  | 1.00E+00 |
|               | <b>SIPI</b>    | 0.087       | 0.075  | 0.115  | 0.087  | 1.00E+00 |
|               | <b>BGI2</b>    | 0.864       | 0.905  | 0.877  | 0.890  | 1.00E+00 |
|               | <b>TVI</b>     | 831.7       | 542.5  | 478.6  | 741.8  | 1.00E+00 |
|               | <b>MCARI</b>   | 6.529       | 5.467  | 4.445  | 7.933  | 1.00E+00 |
| 'Code Green'  | <b>PRI570</b>  | -0.001      | -0.013 | -0.005 | 0.006  | 1.00E+00 |
|               | <b>RDVI</b>    | 7.730       | 8.484  | 8.092  | 7.592  | 1.00E+00 |
|               | <b>WI</b>      | 1.043       | 1.030  | 1.040  | 1.049  | 1.00E+00 |
|               | <b>NDVI</b>    | 0.530       | 0.589  | 0.542  | 0.509  | 1.00E+00 |
|               | <b>WI:NDVI</b> | 1.969       | 1.748  | 1.920  | 2.060  | 1.00E+00 |
|               | <b>NWI</b>     | -0.021      | -0.015 | -0.019 | -0.024 | 1.00E+00 |
|               | <b>OSAVI</b>   | 0.614       | 0.683  | 0.628  | 0.590  | 1.00E+00 |

|                     |                |        |        |        |        |          |
|---------------------|----------------|--------|--------|--------|--------|----------|
|                     | <b>SIPI</b>    | 0.529  | 0.589  | 0.551  | 0.534  | 1.00E+00 |
|                     | <b>BGI2</b>    | 0.605  | 0.574  | 0.559  | 0.519  | 1.00E+00 |
|                     | <b>TVI</b>     | 8334   | 8918   | 8189   | 7900   | 1.00E+00 |
|                     | <b>MCARI</b>   | 75.97  | 84.15  | 96.62  | 103.8  | 1.00E+00 |
| <b>'Euro White'</b> | <b>PRI570</b>  | 0.036  | 0.041  | 0.040  | 0.030  | 1.00E+00 |
|                     | <b>RDVI</b>    | 0.353  | 0.314  | 0.551  | 0.468  | 1.00E+00 |
|                     | <b>WI</b>      | 1.040  | 1.031  | 1.023  | 1.040  | 1.00E+00 |
|                     | <b>NDVI</b>    | 0.019  | 0.016  | 0.029  | 0.025  | 1.00E+00 |
|                     | <b>WI:NDVI</b> | 56.05  | 62.86  | 34.84  | 42.18  | 1.00E+00 |
|                     | <b>NWI</b>     | -0.020 | -0.015 | -0.011 | -0.019 | 1.00E+00 |
|                     | <b>OSAVI</b>   | 0.022  | 0.019  | 0.034  | 0.029  | 1.00E+00 |
|                     | <b>SIPI</b>    | 0.119  | 0.108  | 0.139  | 0.109  | 1.00E+00 |
|                     | <b>BGI2</b>    | 0.794  | 0.833  | 0.810  | 0.837  | 1.00E+00 |
|                     | <b>TVI</b>     | 313.6  | 100.9  | 150.3  | 395.4  | 1.15E-09 |
|                     | <b>MCARI</b>   | 1.383  | 1.961  | 2.319  | 4.305  | 1.00E+00 |

**Supplementary Table S4.** Vase life, transpiration during vase life (data in Fig. 1), cut flower water content, rehydration-induced cut flower fresh weight increase following 10 % weight loss (data in Fig. 7), leaf hydrogen peroxide (H<sub>2</sub>O<sub>2</sub>) content, leaf malondialdehyde (MDA) content, leaf total phenolic content, and leaf total flavonoid content (data in Fig. 8) as function of storage time (5 °C and darkness) in three cut chrysanthemum cultivars. Means  $\pm$  SE followed by different letters within each column indicate significant differences based on Tukey's Honest significant difference test at  $P \leq 0.05$ .

| Cultivar                         | Storage period (d) | Vase life (d)                  | Transpiration during vase life (g g <sup>-1</sup> d <sup>-1</sup> ) | Water content (%)               | Weight increase (%)            | H <sub>2</sub> O <sub>2</sub> content (μmol g <sup>-1</sup> ) | MDA content (μmol g <sup>-1</sup> ) | Total phenolic content (μg GAE g <sup>-1</sup> ) | Total flavonoid content (μg RUE g <sup>-1</sup> ) |
|----------------------------------|--------------------|--------------------------------|---------------------------------------------------------------------|---------------------------------|--------------------------------|---------------------------------------------------------------|-------------------------------------|--------------------------------------------------|---------------------------------------------------|
| 'Pina Colada'                    | 0                  | 25.5 $\pm$ 0.401 <sup>a</sup>  | 0.231 $\pm$ 0.00745                                                 | 86.6 $\pm$ 0.141 <sup>bcd</sup> | 12.3 $\pm$ 0.456 <sup>ab</sup> | 0.362 $\pm$ 0.00669 <sup>f</sup>                              | 0.61 $\pm$ 0.00436 <sup>g</sup>     | 21.4 $\pm$ 0.348 <sup>hi</sup>                   | 10.6 $\pm$ 0.348 <sup>e</sup>                     |
| 'Code Green'                     |                    | 26.4 $\pm$ 0.4 <sup>a</sup>    | 0.27 $\pm$ 0.0119                                                   | 83.6 $\pm$ 0.472 <sup>g</sup>   | 7.34 $\pm$ 0.435 <sup>de</sup> | 0.361 $\pm$ 0.01 <sup>f</sup>                                 | 0.545 $\pm$ 0.00737 <sup>b</sup>    | 19.6 $\pm$ 1.13 <sup>j</sup>                     | 11.2 $\pm$ 0.318 <sup>fg</sup>                    |
| 'Euro White'                     |                    | 25.7 $\pm$ 0.335 <sup>a</sup>  | 0.26 $\pm$ 0.00772                                                  | 86.1 $\pm$ 0.184 <sup>cf</sup>  | 6.95 $\pm$ 0.588 <sup>de</sup> | 0.378 $\pm$ 0.013 <sup>f</sup>                                | 0.593 $\pm$ 0.0112 <sup>gh</sup>    | 17.4 $\pm$ 0.536 <sup>j</sup>                    | 12.1 $\pm$ 1 <sup>fg</sup>                        |
| 'Pina Colada'                    | 7                  | 20.1 $\pm$ 1.24 <sup>b</sup>   | 0.26 $\pm$ 0.0146                                                   | 87.2 $\pm$ 0.194 <sup>acd</sup> | 12.1 $\pm$ 0.905 <sup>ab</sup> | 0.378 $\pm$ 0.00721 <sup>f</sup>                              | 0.629 $\pm$ 0.00722 <sup>fg</sup>   | 24.8 $\pm$ 0.219 <sup>gh</sup>                   | 11.1 $\pm$ 0.393 <sup>e</sup>                     |
| 'Code Green'                     |                    | 17.9 $\pm$ 0.482 <sup>bc</sup> | 0.22 $\pm$ 0.0104                                                   | 85.5 $\pm$ 0.378 <sup>ef</sup>  | 8.78 $\pm$ 0.35 <sup>cd</sup>  | 0.414 $\pm$ 0.00577 <sup>ef</sup>                             | 0.682 $\pm$ 0.0142 <sup>ef</sup>    | 28.2 $\pm$ 0.684 <sup>fg</sup>                   | 11.5 $\pm$ 0.291 <sup>fg</sup>                    |
| 'Euro White'                     |                    | 16.1 $\pm$ 0.849 <sup>c</sup>  | 0.27 $\pm$ 0.0152                                                   | 87.1 $\pm$ 0.385 <sup>acd</sup> | 7.27 $\pm$ 0.457 <sup>de</sup> | 0.464 $\pm$ 0.00418 <sup>de</sup>                             | 0.83 $\pm$ 0.0131 <sup>c</sup>      | 33 $\pm$ 0.819 <sup>de</sup>                     | 12.7 $\pm$ 0.12 <sup>fg</sup>                     |
| 'Pina Colada'                    | 14                 | 12.5 $\pm$ 0.401 <sup>d</sup>  | 0.262 $\pm$ 0.0337                                                  | 87.7 $\pm$ 0.0879 <sup>ab</sup> | 13.2 $\pm$ 0.516 <sup>a</sup>  | 0.415 $\pm$ 0.0162 <sup>ef</sup>                              | 0.639 $\pm$ 0.0105 <sup>fg</sup>    | 30.1 $\pm$ 0.639 <sup>ef</sup>                   | 14 $\pm$ 0.379 <sup>ef</sup>                      |
| 'Code Green'                     |                    | 10.6 $\pm$ 0.267 <sup>de</sup> | 0.232 $\pm$ 0.0196                                                  | 85 $\pm$ 0.45 <sup>fg</sup>     | 10.3 $\pm$ 0.497 <sup>bc</sup> | 0.486 $\pm$ 0.00601 <sup>cd</sup>                             | 0.761 $\pm$ 0.015 <sup>d</sup>      | 35.7 $\pm$ 0.737 <sup>d</sup>                    | 16.2 $\pm$ 0.809 <sup>de</sup>                    |
| 'Euro White'                     |                    | 8.5 $\pm$ 0.719 <sup>ef</sup>  | 0.286 $\pm$ 0.0335                                                  | 87.3 $\pm$ 0.158 <sup>ac</sup>  | 11.2 $\pm$ 0.509 <sup>ac</sup> | 0.532 $\pm$ 0.0165 <sup>bc</sup>                              | 0.941 $\pm$ 0.0078 <sup>b</sup>     | 41.3 $\pm$ 0.968 <sup>c</sup>                    | 18.8 $\pm$ 0.723 <sup>cd</sup>                    |
| 'Pina Colada'                    | 21                 | 6.8 $\pm$ 0.757 <sup>fg</sup>  | 0.265 $\pm$ 0.0376                                                  | 87.5 $\pm$ 0.0993 <sup>ac</sup> | 12.7 $\pm$ 0.621 <sup>ab</sup> | 0.436 $\pm$ 0.0155 <sup>de</sup>                              | 0.721 $\pm$ 0.0109 <sup>de</sup>    | 42.8 $\pm$ 0.819 <sup>c</sup>                    | 19.9 $\pm$ 0.689 <sup>bc</sup>                    |
| 'Code Green'                     |                    | 4.8 $\pm$ 0.49 <sup>gh</sup>   | 0.292 $\pm$ 0.0165                                                  | 85.9 $\pm$ 0.428 <sup>df</sup>  | 4.86 $\pm$ 0.476 <sup>e</sup>  | 0.576 $\pm$ 0.00837 <sup>ab</sup>                             | 0.957 $\pm$ 0.0106 <sup>b</sup>     | 48.5 $\pm$ 0.504 <sup>b</sup>                    | 22.1 $\pm$ 0.145 <sup>b</sup>                     |
| 'Euro White'                     |                    | 2.3 $\pm$ 0.3 <sup>b</sup>     | 0.277 $\pm$ 0.0573                                                  | 88 $\pm$ 0.158 <sup>a</sup>     | 7.09 $\pm$ 0.429 <sup>de</sup> | 0.618 $\pm$ 0.00839 <sup>a</sup>                              | 1.06 $\pm$ 0.0251 <sup>a</sup>      | 56.2 $\pm$ 0.78 <sup>a</sup>                     | 25.2 $\pm$ 0.491 <sup>a</sup>                     |
| n                                |                    | 10                             | 10                                                                  | 12                              | 12                             | 3                                                             | 3                                   | 3                                                | 3                                                 |
| P                                |                    |                                |                                                                     |                                 |                                |                                                               |                                     |                                                  |                                                   |
| Cultivar                         |                    | <0.001                         | 0.555                                                               | <0.001                          | <0.001                         | <0.001                                                        | <0.001                              | <0.001                                           | <0.001                                            |
| Storage period                   |                    | <0.001                         | 0.656                                                               | <0.001                          | <0.001                         | <0.001                                                        | <0.001                              | <0.001                                           | <0.001                                            |
| Cultivar $\times$ Storage period |                    | 0.005                          | 0.725                                                               | 0.162                           | <0.001                         | <0.001                                                        | <0.001                              | <0.001                                           | 0.011                                             |

**Supplementary Table S5.** Leaf mineral analysis of three cut chrysanthemum cultivars, employed for vase life evaluation (n = 6). Means  $\pm$  SE followed by different letters within each column indicate significant differences based on Tukey's Honest significant difference test at  $P \leq 0.05$ .

| Cultivar      | N (%)            | P (%)            | K (%)             | Na (%)            | Ca (%)           | Zn (%)             | Fe (%)             | Mg (%)           |
|---------------|------------------|------------------|-------------------|-------------------|------------------|--------------------|--------------------|------------------|
| 'Pina Colada' | 7.42 $\pm$ 0.14a | 0.18 $\pm$ 0.02c | 3.46 $\pm$ 0.14ab | 0.24 $\pm$ 0.01a  | 0.38 $\pm$ 0.02a | 0.003 $\pm$ 0.00b  | 0.010 $\pm$ 0.00a  | 0.17 $\pm$ 0.03a |
| 'Code Green'  | 4.72 $\pm$ 0.06b | 0.16 $\pm$ 0.01a | 3.95 $\pm$ 0.19a  | 0.21 $\pm$ 0.01ab | 0.36 $\pm$ 0.02a | 0.004 $\pm$ 0.00a  | 0.009 $\pm$ 0.00ab | 0.22 $\pm$ 0.05a |
| 'Euro White'  | 4.32 $\pm$ 0.04c | 0.19 $\pm$ 0.04b | 3.42 $\pm$ 0.07b  | 0.19 $\pm$ 0.00b  | 0.37 $\pm$ 0.03a | 0.003 $\pm$ 0.00ab | 0.008 $\pm$ 0.00b  | 0.18 $\pm$ 0.00a |
| <i>P</i>      | 0.000            | 0.840            | 0.033             | 0.001             | 0.916            | 0.041              | 0.008              | 0.485            |

**Supplementary Table S6.** Floral mineral analysis of three cut chrysanthemum cultivars, employed for vase life evaluation (n = 6). Means  $\pm$  SE followed by different letters within each column indicate significant differences based on Tukey's Honest significant difference test at  $P \leq 0.05$ .

| Cultivar      | N (%)           | P (%)            | K (%)            | Na (%)           | Ca (%)           | Zn (%)            | Fe (%)            | Mg (%)           |
|---------------|-----------------|------------------|------------------|------------------|------------------|-------------------|-------------------|------------------|
| 'Pina Colada' | 3.22 $\pm$ 0.5b | 0.19 $\pm$ 0.00a | 1.83 $\pm$ 0.04b | 0.14 $\pm$ 0.00b | 0.02 $\pm$ 0.00b | 0.003 $\pm$ 0.00a | 0.003 $\pm$ 0.00a | 0.22 $\pm$ 0.03a |
| 'Code Green'  | 3.64 $\pm$ 0.4a | 0.23 $\pm$ 0.01a | 2.58 $\pm$ 0.18a | 0.16 $\pm$ 0.00a | 0.08 $\pm$ 0.01a | 0.003 $\pm$ 0.00a | 0.003 $\pm$ 0.00a | 0.12 $\pm$ 0.00b |
| 'Euro White'  | 2.78 $\pm$ 0.3c | 0.16 $\pm$ 0.01a | 2.26 $\pm$ 0.02a | 0.15 $\pm$ 0.00b | 0.06 $\pm$ 0.00a | 0.002 $\pm$ 0.00a | 0.002 $\pm$ 0.00a | 0.15 $\pm$ 0.01b |
| <i>P</i>      | 0.000           | 0.000            | 0.01             | 0.000            | 0.000            | 0.361             | 1.000             | 0.005            |



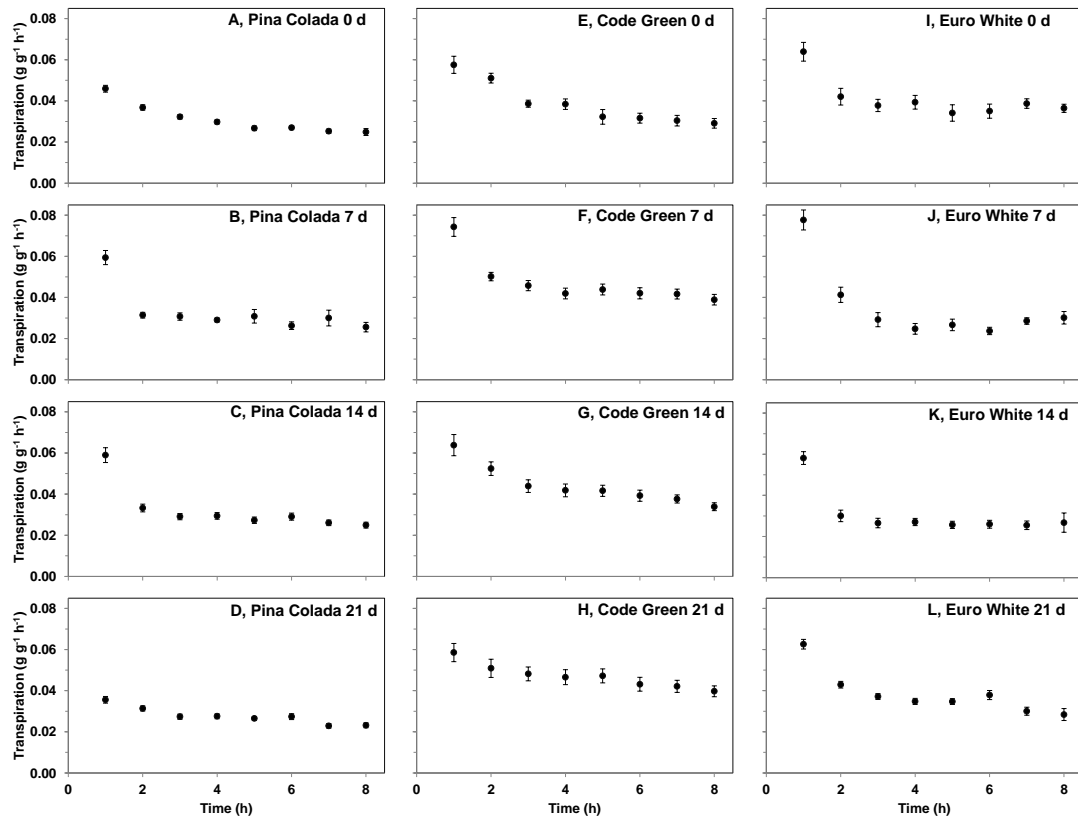

**Supplementary Figure S1.** Leaf transpirational water loss, per initial weight, as a function of desiccation time in three cut chrysanthemum cultivars stored (5 °C and darkness) for different periods (0, 7, 14, and 21 d) prior to evaluation (n = 12). When the SE bars are not visible, the SE is smaller than the symbol.

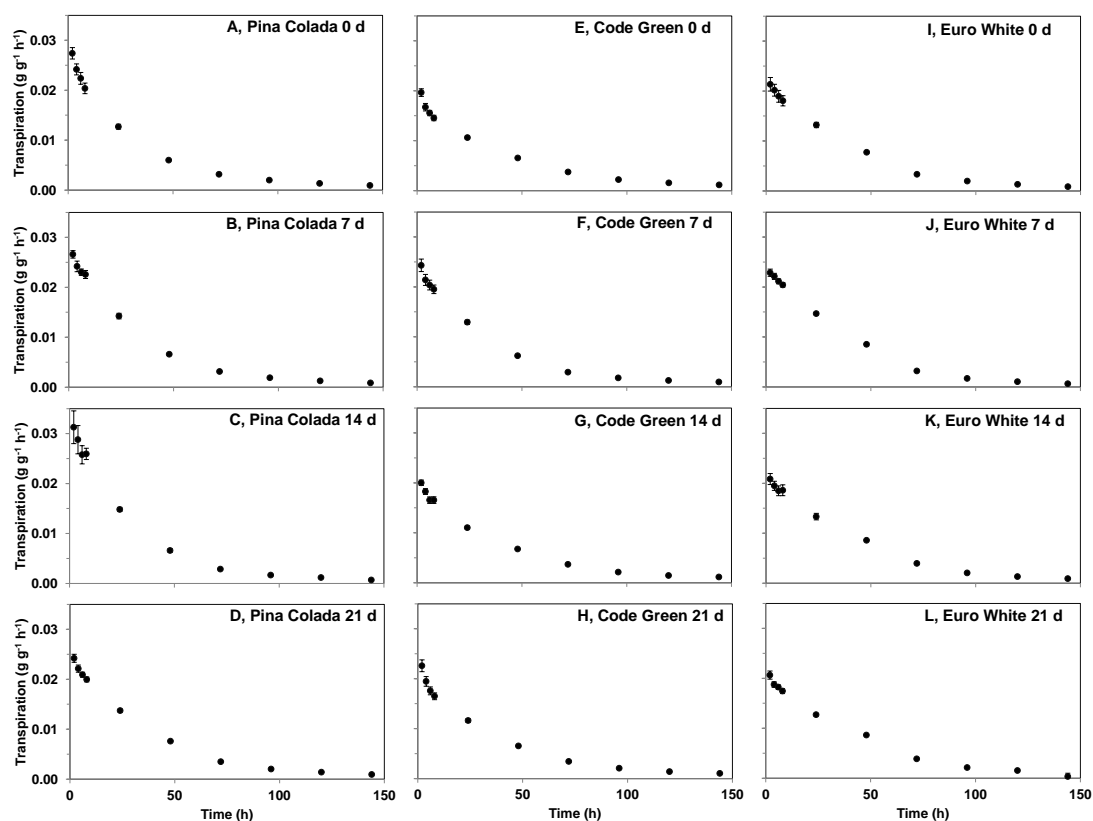

**Supplementary Figure S2.** Stem transpirational water loss, per initial weight, as a function of desiccation time in three cut chrysanthemum cultivars stored (5 °C and darkness) for different periods (0, 7, 14, and 21 d) prior to evaluation (n = 12). When the SE bars are not visible, the SE is smaller than the symbol.

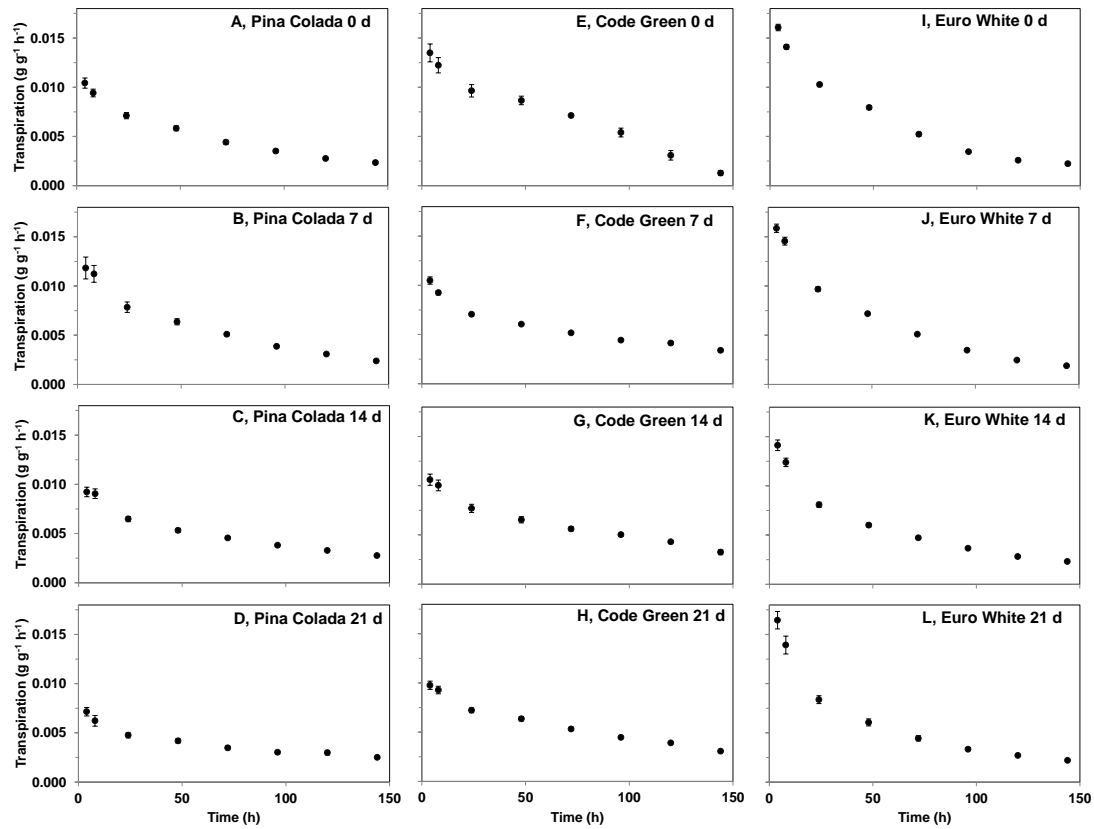

**Supplementary Figure S3.** Floral transpirational water loss, per initial weight, as a function of desiccation time in three cut chrysanthemum cultivars stored (5 °C and darkness) for different periods (0, 7, 14, and 21 d) prior to evaluation (n = 12). When the SE bars are not visible, the SE is smaller than the symbol.
